# Supplementary material for: Hepatocyte MyD88 affects bile acids, gut microbiota and metabolome contributing to regulate glucose and lipid metabolism
Source: PubMed Central journal article supplement — Gut. 2016 May 5;66(4):620–32. doi: 10.1136/gutjnl-2015-310904 (PMC5529962; doi:10.1136/gutjnl-2015-310904), 2016-05-05
Supplement: gutjnl-2015-310904supp002.pdf [file gutjnl-2015-310904supp002.pdf]

**Table S1. List of 167 probes commonly affected in LKO-CT mice, WT-HFD mice and LKO-HFD mice compared to WT-CT mice.**

The fold change between LKO-CT, WT-HFD and LKOK-HFD compared to WT-CT is indicated in the columns as log<sub>2</sub>

| Probe.Set.ID | Gene Symbol  | Gene.Symbol | LKO-CT    | WT-HFD    | LKO-HFD   |
|--------------|--------------|-------------|-----------|-----------|-----------|
| 17478195     | Saa2         | Saa2        | 7,370013  | 5,755123  | 5,853503  |
| 17491205     | Saa1         | Saa1        | 6,102069  | 4,791239  | 4,529969  |
| 17414747     | Orm2         | Orm2        | 3,319145  | 1,921123  | 1,957125  |
| 17491193     | Saa3         | Saa3        | 3,043901  | 2,032648  | 3,472505  |
| 17438987     | Cxcl1        | Cxcl1       | 2,279682  | 1,830092  | 1,468642  |
| 17278328     | Serpina3n    | Serpina3n   | 1,31942   | 0,75019   | 0,88362   |
| 17227892     | Prg4         | Prg4        | 1,317288  | 1,242346  | 1,192194  |
| 17343976     | C4a          | C4a         | 1,089535  | 2,609828  | 1,471425  |
| 17449725     | Cxcl11       | ---         | 1,021574  | 0,927764  | 1,280023  |
| 17360785     | Pnliprp2     | Pnliprp2    | 0,969179  | 0,781447  | 1,608033  |
| 17329433     | Bcl6         | ---         | 0,93163   | 1,173004  | 0,85441   |
| 17344642     | H2-T10       | H2-T10      | 0,768767  | 0,98344   | 0,814441  |
| 17450501     | Gbp10        | Gbp10       | 0,674585  | 1,151772  | 1,796059  |
| 17447081     | Spon2        | Spon2       | -0,668347 | -1,704003 | -1,338662 |
| 17337089     | H2-Q1        | H2-Q1       | -0,718314 | -1,116485 | -1,008623 |
| 17364392     | Cyp2c38      | Cyp2c38     | -2,092596 | -2,937161 | -1,282779 |
| 17475373     | Cyp2b13      | Cyp2b13     | -2,021517 | -1,671743 | -1,445154 |
| 17427401     | Cyp2j9       | ---         | -1,264199 | -1,232145 | -0,840846 |
| 17428457     | Cyp4a14      | Cyp4a14     | -1,10848  | -2,795866 | -2,019194 |
| 17475399     | Cyp2a4       | Cyp2a4      | -1,089105 | -1,409801 | -1,3409   |
| 17455175     | Cyp3a11      | Cyp3a11     | -0,904453 | -1,111336 | -0,880387 |
| 17417240     | Cyp4a31      | Cyp4a31     | -0,836602 | -1,641211 | -1,728979 |
| 17455143     | Cyp3a16      | Cyp3a41a    | -0,813635 | -0,864706 | -0,804484 |
| 17417223     | Cyp4a10      | Cyp4a10     | -0,77271  | -1,16689  | -1,04662  |
| 17455127     | Cyp3a16      | Cyp3a41a    | -0,760869 | -0,86204  | -0,844117 |
| 17488105     | Cyp2a22      | Cyp2a22     | -0,672239 | -0,683303 | -0,666242 |
| 17359239     | Cyp2c55      | Cyp2c55     | -0,662159 | -0,845033 | -0,638905 |
| 17319691     | Cyp2d40      | Cyp2d40     | 0,613032  | 1,292794  | 0,895793  |
| 17404245     | Cyp7b1       | Cyp7b1      | 0,86116   | 0,85953   | 0,81984   |
| 17229059     | Fmo3         | Fmo3        | -2,795058 | -2,631319 | -2,700262 |
| 17238172     | Rdh16        | Rdh16       | -1,046525 | -1,11459  | -0,722785 |
| 17502573     | Hmox1        | Hmox1       | -0,868668 | -0,797006 | -0,768454 |
| 17329220     | Ehhadh       | Ehhadh      | -0,847875 | -1,137427 | -0,871403 |
| 17212982     | Aox1         | Aox1        | -0,78278  | -0,850831 | -0,634437 |
| 17371427     | Dhrs9        | ---         | -0,648435 | -1,181712 | -1,110471 |
| 17478352     | Htatip2      | Htatip2     | -0,642795 | -0,803917 | -0,802385 |
| 17547965     | LOC102642943 | Cbr1        | -0,634542 | -1,237948 | -0,982027 |
| 17434490     | Steap4       | Steap4      | 1,111192  | 1,138382  | 1,273066  |

|          |               |           |           |           |           |
|----------|---------------|-----------|-----------|-----------|-----------|
| 17232215 | Moxd1         | Moxd1     | 5,003753  | 5,202583  | 3,403008  |
| 17214018 | Gm8883        | ---       | 0,663969  | 0,747778  | 0,757602  |
| 17229403 | Mgst3         | ---       | -0,81163  | -1,252537 | -1,096976 |
| 17232843 | Zbtb24        | Zbtb24    | -0,699505 | -0,686836 | -0,832853 |
| 17235408 | Dot1l         | ---       | -0,593785 | -0,792152 | -1,044925 |
| 17235462 | Oaz1          | ---       | -0,598822 | -1,097752 | -1,183788 |
| 17238832 | ---           | ---       | -0,897157 | -0,869305 | -1,070047 |
| 17243525 | Slc41a2       | ---       | 0,732715  | 0,798443  | 0,604933  |
| 17245665 | Xrcc6bp1      | Xrcc6bp1  | 0,670022  | 0,955973  | 0,899869  |
| 17246963 | LOC102639290  | Gm11963   | 0,73098   | 1,227304  | 0,955108  |
| 17258285 | Gm23699       | ---       | 0,842439  | 1,42587   | 0,878269  |
| 17260075 | Gas2l1        | Gas2l1    | -0,591902 | -0,786731 | -1,076754 |
| 17262755 | Slc22a5       | Slc22a5   | -0,686853 | -1,342648 | -1,283833 |
| 17269866 | Gm11619       | Gm11619   | 0,755376  | 2,239836  | 1,740969  |
| 17274184 | Socs2         | ---       | -1,611146 | -1,855159 | -1,367769 |
| 17274415 | Asap2         | Asap2     | -0,602978 | -1,049368 | -1,123707 |
| 17277140 | Acot1         | Acot1     | -1,195364 | -1,406858 | -1,235975 |
| 17285783 | Vmn1r213      | Vmn1r213  | 0,649667  | 0,670379  | 0,624876  |
| 17289160 | Gm15622       | ---       | 0,727303  | 1,231948  | 0,750775  |
| 17300153 | A430107P09Rik | ---       | -0,630138 | -0,863211 | -0,756258 |
| 17306098 | Rnase1        | ---       | 0,983079  | 0,797824  | 2,061199  |
| 17308714 | Slc25a30      | Slc25a30  | -0,69248  | -0,897905 | -0,938004 |
| 17315178 | Nr4a1         | Nr4a1     | -0,644872 | -1,278637 | -0,651269 |
| 17320652 | Abcd2         | ---       | -1,371312 | -1,935267 | -0,723876 |
| 17321780 | Cela1         | Cela1     | 1,843057  | 1,986411  | 2,853397  |
| 17322146 | Csad          | Csad      | -1,142144 | -3,606592 | -2,606896 |
| 17326636 | Gm24272       | ---       | -0,632934 | -0,866791 | -0,67393  |
| 17327255 | Cbr1          | Cbr1      | -0,72745  | -1,420232 | -0,969035 |
| 17327909 | Ppl           | Ppl       | -0,604634 | -0,814832 | -0,607297 |
| 17328062 | Emp2          | Emp2      | -1,19142  | -1,575097 | -1,116028 |
| 17328933 | Mir185        | ---       | 0,887884  | 1,103296  | 0,775653  |
| 17335790 | LOC102631757  | ---       | 0,666437  | 0,856176  | 0,814978  |
| 17342890 | Clps          | Clps      | 2,348714  | 2,192681  | 3,579279  |
| 17346136 | Plin5         | ---       | -0,617878 | -0,825814 | -0,777044 |
| 17350914 | Gm23521       | ---       | -0,889917 | -0,734367 | -0,690796 |
| 17350932 | BC023105      | BC023105  | 0,701372  | 0,986289  | 1,359491  |
| 17355984 | Chka          | Chka      | -0,603482 | -1,451771 | -1,277219 |
| 17357502 | Cpsf7         | ---       | -0,814393 | -0,598956 | -0,786651 |
| 17357810 | Mpeg1         | Mpeg1     | 0,817937  | 0,688536  | 0,613656  |
| 17360751 | Pnlip         | Pnlip     | 3,017079  | 2,597514  | 3,643329  |
| 17360770 | Pnliprp1      | Pnliprp1  | 2,599657  | 2,0128    | 3,761002  |
| 17361805 | Neat1         | ---       | -0,92633  | -0,937817 | -1,19616  |
| 17362369 | Slc22a26      | Slc22a26  | -2,082142 | -2,234097 | -2,048697 |
| 17362383 | Slc22a27      | Slc22a27  | -0,808155 | -0,610062 | -0,592533 |
| 17364426 | ---           | Cyp2c69   | -0,685025 | -1,6416   | -1,376226 |
| 17366922 | Mir669m-1     | Mir669m-1 | -0,98159  | -1,060051 | -1,143197 |

|          |              |               |           |           |           |
|----------|--------------|---------------|-----------|-----------|-----------|
| 17371310 | B3galt1      | ---           | 1,231124  | 0,791246  | 1,102267  |
| 17373930 | Them7        | 0610012H03Rik | 0,677376  | 1,275117  | 1,286556  |
| 17379169 | Sgk2         | Sgk2          | -0,72076  | -1,027613 | -0,782916 |
| 17382359 | Gm24875      | ---           | 0,615296  | 0,806904  | 0,700387  |
| 17383381 | Cel          | Cel           | 2,495372  | 2,242565  | 3,499396  |
| 17383892 | Lcn2         | Lcn2          | 4,297404  | 2,585926  | 3,399954  |
| 17385099 | Neb          | ---           | 0,727603  | 1,745761  | 1,745368  |
| 17390614 | Mfap1b       | Mfap1b        | -0,721807 | -1,120949 | -0,782782 |
| 17391997 | Gpcpd1       | ---           | 0,821441  | 1,3226    | 1,616572  |
| 17394297 | Pltp         | Pltp          | -0,592664 | -0,620567 | -0,781125 |
| 17400124 | Selenbp2     | Selenbp2      | 0,913904  | 1,590434  | 1,123854  |
| 17400549 | Hist2h3c1    | ---           | 1,067777  | 1,041029  | 0,744624  |
| 17401890 | ---          | Amy2a5        | 2,692086  | 1,70158   | 2,584182  |
| 17401893 | ---          | Amy2a5        | 2,692086  | 1,70158   | 2,584182  |
| 17401896 | ---          | Amy2a5        | 2,692086  | 1,70158   | 2,584182  |
| 17401899 | ---          | Amy2a5        | 2,692086  | 1,70158   | 2,584182  |
| 17403224 | Gbp7         | Gbp7          | 0,815425  | 0,673136  | 1,094339  |
| 17404350 | Cpb1         | Cpb1          | 2,833201  | 2,606331  | 3,737773  |
| 17409130 | Gstm3        | Gstm3         | -1,551112 | -2,503804 | -2,162573 |
| 17409142 | ---          | Gstm2         | -0,685626 | -0,792389 | -0,780586 |
| 17409513 | Amy2a1       | Amy2a1        | 2,065059  | 1,730069  | 2,293989  |
| 17409526 | Amy2a1       | Amy2a1        | 1,82967   | 1,60518   | 2,14506   |
| 17409540 | Amy2a1       | Amy2a1        | 1,757652  | 1,520942  | 2,084102  |
| 17409555 | Amy2a1       | Amy2a1        | 1,617243  | 1,386103  | 1,924683  |
| 17414512 | Mup-ps12     | Mup-ps5       | 1,207248  | 1,664829  | 1,388515  |
| 17414520 | Gm13775      | Gm13775       | 0,606252  | 1,103807  | 1,43909   |
| 17419890 | Il22ra1      | Il22ra1       | -0,688984 | -1,507347 | -1,266749 |
| 17423317 | LOC102639547 | ---           | -0,761879 | -0,752152 | -0,713646 |
| 17423724 | ---          | ---           | 0,734651  | 0,978675  | 1,306408  |
| 17429632 | Mfsd2a       | Mfsd2a        | -0,896362 | -0,965651 | -0,605792 |
| 17431693 | Cela3b       | Cela3b        | 1,657087  | 1,463028  | 2,110589  |
| 17432320 | Cela2a       | Cela2a        | 2,264564  | 1,819472  | 3,034553  |
| 17433942 | Gm25982      | ---           | -1,965972 | -2,000892 | -1,839728 |
| 17439116 | Fam47e       | Fam47e        | 1,024523  | 1,236136  | 0,859359  |
| 17440293 | Idua         | Idua          | -0,694638 | -0,687066 | -0,630763 |
| 17445565 | Gm15611      | Gm15611       | 0,795923  | -1,797011 | -0,74186  |
| 17451839 | ---          | ---           | -0,670977 | -1,857221 | -1,638529 |
| 17454214 | Gm4963       | Gm4963        | -0,611955 | -0,868712 | -0,844976 |
| 17455159 | Cyp3a44      | Cyp3a44       | -0,824795 | -0,927377 | -0,952801 |
| 17455296 | Gm24556      | ---           | 0,907333  | 1,029282  | 0,64672   |
| 17455314 | Urad         | Prhoxnb       | 0,614561  | 0,976924  | 0,946754  |
| 17455386 | Slc46a3      | Slc46a3       | 0,616081  | 1,544812  | 1,37318   |
| 17456868 | Cpa2         | Cpa2          | 0,855819  | 0,794749  | 1,000604  |
| 17456918 | Cpa1         | Cpa1          | 2,268935  | 2,316815  | 3,45703   |
| 17457731 | Try4         | Try4          | 1,62592   | 1,683831  | 2,854554  |
| 17457753 | Gm5409       | Gm5409        | 1,886356  | 1,442832  | 2,528442  |

|          |                |          |           |           |           |
|----------|----------------|----------|-----------|-----------|-----------|
| 17457787 | Tcrb-J         | Tcrb-J   | 0,59831   | 0,758652  | 0,859524  |
| 17458573 | Snx10          | Snx10    | 0,617273  | 0,587616  | 0,962612  |
| 17459769 | Reg1           | Reg1     | 2,964686  | 1,46582   | 3,399425  |
| 17464654 | Pdk4           | Pdk4     | -1,603508 | -1,31989  | -1,550386 |
| 17475870 | Sycn           | Sycn     | 2,348859  | 2,147174  | 3,316041  |
| 17477391 | Klk1           | Klk1     | 3,541898  | 2,732375  | 4,891063  |
| 17478819 | E030018B13Rik  | ---      | 1,384518  | 1,21318   | 0,761205  |
| 17483381 | ---            | ---      | -0,615143 | -0,850538 | -0,755066 |
| 17483383 | Snora30        | ---      | -0,778484 | -0,814204 | -1,366106 |
| 17490899 | Fgf21          | Fgf21    | -0,990379 | -2,159343 | -2,179308 |
| 17491378 | E2f8           | E2f8     | -0,852344 | -0,732178 | -0,791383 |
| 17494643 | Gvin1          | Gm4070   | 1,277774  | 1,389079  | 1,674573  |
| 17494651 | Gm8995         | ---      | 0,800728  | 0,929693  | 1,315624  |
| 17494656 | Gvin1          | Gm4070   | 1,496478  | 1,491021  | 1,806654  |
| 17494664 | 9130208D14Rik  | ---      | 0,715289  | 0,795468  | 1,181914  |
| 17494894 | St5            | ---      | -0,789774 | -0,851595 | -1,137864 |
| 17499111 | Gm26483        | ---      | -0,749782 | -1,065368 | -0,863252 |
| 17503937 | Mt2            | Mt2      | 2,697968  | 1,561788  | 2,033058  |
| 17503942 | Mt1            | ---      | 2,408367  | 1,726191  | 2,31845   |
| 17504019 | Ap3s1-ps2      | ---      | -1,370348 | -1,933948 | -1,659084 |
| 17505769 | ---            | Ctrb1    | 1,198952  | 0,706983  | 1,901097  |
| 17506510 | Snord68        | ---      | -0,593339 | -1,019273 | -1,648047 |
| 17512544 | Ctrl           | Ctrl     | 2,610587  | 2,439377  | 3,654411  |
| 17513149 | Ctrb1          | Ctrb1    | 2,344375  | 2,37443   | 3,429032  |
| 17519649 | Gsta4          | Gsta4    | -0,802135 | -0,776904 | -0,654737 |
| 17519673 | Gsta1          | Gsta2    | -0,664051 | -1,977488 | -1,286894 |
| 17526695 | Nnmt           | Nnmt     | 1,931789  | 1,846236  | 1,456947  |
| 17530990 | Gnat1          | Gnat1    | 0,83628   | 0,686003  | 0,585912  |
| 17534051 | Il13ra1        | Il13ra1  | 0,710979  | 0,898688  | 0,92742   |
| 17544837 | Serpina7       | Serpina7 | -1,064285 | -1,540051 | -0,787303 |
| 17548238 | Fabp5          | Gm3601   | 2,041908  | -0,898736 | -0,808686 |
| 17548717 | Fabp5          | Gm3601   | 2,097791  | -1,02991  | -0,879211 |
| 17549338 | Mir1247        | ---      | 0,701728  | 1,893949  | 0,65486   |
| 17550284 | Gm26483        | ---      | -0,749782 | -1,065368 | -0,863252 |
| 17550318 | Mir2137        | ---      | 0,668733  | 1,099401  | 1,11576   |
| 17550426 | Neat1          | ---      | -0,78924  | -0,804421 | -1,135099 |
| 17550428 | Neat1B1B2:B171 | ---      | -1,06308  | -1,00042  | -0,99417  |
