# Supplementary material for: Hepatocyte MyD88 affects bile acids, gut microbiota and metabolome contributing to regulate glucose and lipid metabolism
Source: PubMed Central journal article supplement — Gut. 2016 May 5;66(4):620–32. doi: 10.1136/gutjnl-2015-310904 (PMC5529962; doi:10.1136/gutjnl-2015-310904), 2016-05-05
Supplement: gutjnl-2015-310904supp004.pdf [file gutjnl-2015-310904supp004.pdf]

**Table S3 : Genera significantly enriched or depleted in LKO-CT mice compared to WT-CT.**

| Species             | <i>p</i>   | WT-CT  |       | LKO-CT |       |
|---------------------|------------|--------|-------|--------|-------|
|                     |            | Mean   | SEM   | Mean   | SEM   |
| <i>Allobaculum</i>  | 0,01998941 | 14,757 | 3,565 | 5,309  | 1,216 |
| <i>Ruminococcus</i> | 0,01174936 | 0,299  | 0,062 | 0,634  | 0,105 |
| <i>Sutterella</i>   | 0,02853385 | 2,212  | 0,794 | 0,335  | 0,109 |

Data are shown as the means and SEM. Significant differences ( $P < 0.05$ ) between the two groups are indicated. P values are based on the 2-sample t-test assuming equal variances. Student t-test results were corrected by an FDR test according to the Benjamini-Hochberg procedure, with an  $\alpha$  of  $< 0.05$ , significant p-values after FDR correction are depicted in red.
