# Supplementary material for: Hepatocyte MyD88 affects bile acids, gut microbiota and metabolome contributing to regulate glucose and lipid metabolism
Source: PubMed Central journal article supplement — Gut. 2016 May 5;66(4):620–32. doi: 10.1136/gutjnl-2015-310904 (PMC5529962; doi:10.1136/gutjnl-2015-310904), 2016-05-05
Supplement: gutjnl-2015-310904supp005.pdf [file gutjnl-2015-310904supp005.pdf]

**Table S4. Metabolic NMR integrals for all metabolites measured in plasma expressed as mean and standard deviation with p-values for groups comparisons**

# LKO-HFD vs LKO-CT

\* LKO-CT vs WT-CT

‡ vs WT-HFD

Metabolites highlighted in yellow are significantly different between groups

| ppm         | Metabolites            | WT-CT        | LKO-CT         | WT-HFD        | LKO-HFD       | p-value  |      | Post-hoc statistical tests |      |      |      |      |       |
|-------------|------------------------|--------------|----------------|---------------|---------------|----------|------|----------------------------|------|------|------|------|-------|
|             |                        |              |                |               |               |          |      | 1vs2                       | 1vs3 | 1vs4 | 2vs3 | 2vs4 | 3vs4  |
| 0,60 -0,70  | Cholesterol            | 11,72 ± 0,56 | 9,91 ± 0,58    | 12,17 ± 0,32  | 11,86 ± 0,61  | 0,0233   | ‡    | ,109                       | ,935 | ,998 | ,025 | ,058 | ,974  |
| 0,80 - 0,85 | FA -CH3 (VLDL1/LDL1)   | 23,08 ± 1,96 | 20,35 ± 1,43   | 27,77 ± 1,03  | 25,52 ± 0,78  | 0,0023   | #    | ,497                       | ,078 | ,557 | ,002 | ,038 | ,600  |
| 0,85 -0,90  | 3-methyl-2-oxovalerate | 27,13 ± 2,46 | 25,61 ± 1,76   | 38,00 ± 1,36  | 37,25 ± 1,64  | 5,47E-06 | #, ‡ | ,940                       | ,001 | ,002 | ,000 | ,000 | ,990  |
| 0,90 -0,93  | Isoleucine             | 11,41 ± 0,59 | 10,01 ± 0,44   | 12,64 ± 0,36  | 12,13 ± 0,34  | 0,0008   | #    | ,140                       | ,205 | ,635 | ,001 | ,006 | ,819  |
| 0,93 -0,97  | Leucine                | 14,75 ± 0,66 | 12,96 ± 0,60   | 15,38 ± 0,43  | 15,0 ± 0,46   | 0,0161   | #    | ,119                       | ,843 | ,987 | ,015 | ,045 | ,955  |
| 1,02 -1,05  | Valine                 | 7,13 ± 0,30  | 5,97 ± 0,32    | 6,70 ± 0,16   | 6,57 ± 0,24   | 0,0325   | *    | ,019                       | ,649 | ,425 | ,213 | ,350 | ,993  |
| 1,05 - 1,07 | Methylsuccinate        | 4,60 ± 0,17  | 3,87 ± 0,19    | 4,38 ± 0,09   | 4,24 ± 0,10   | 0,0168   | *    | ,011                       | ,746 | ,351 | ,102 | ,306 | ,911  |
| 1,20 -1,28  | FA (-CH2-)n            | 94,83 ± 7,52 | 120,56 ± 15,14 | 111,46 ± 2,95 | 109,26 ± 3,29 | 0,2105   |      | ,158                       | ,497 | ,597 | ,865 | ,760 | ,997  |
| 1,20 -1,24  | VLDL2                  | 60,51 ± 7,07 | 85,99 ± 17,14  | 64,35 ± 2,89  | 64,72 ± 2,71  | 0,2031   |      | ,219                       | ,990 | ,986 | ,334 | ,331 | 1,000 |
| 1,24 -1,26  | LDL2                   | 17,69 ± 1,86 | 17,70 ± 1,38   | 23,42 ± 0,70  | 22,24 ± 0,98  | 0,0026   | ‡    | 1,000                      | ,015 | ,063 | ,015 | ,064 | ,902  |
| 1,26 -1,28  | 3-hydroxyisovalerate   | 16,64 ± 1,56 | 16,87 ± 1,15   | 23,68 ± 0,80  | 22,29 ± 0,98  | 3,99E-05 | #, ‡ | ,999                       | ,001 | ,005 | ,001 | ,008 | ,804  |
| 1,29 -1,31  | Threonine              | 20,05 ± 2,19 | 17,79 ± 0,79   | 24,95 ± 1,06  | 24,39 ± 1,27  | 0,0018   | #, ‡ | ,690                       | ,086 | ,139 | ,005 | ,009 | ,991  |
| 1,46 -1,48  | Alanine                | 5,34 ± 0,31  | 4,51 ± 0,22    | 4,71 ± 0,19   | 4,79 ± 0,15   | 0,0742   |      | ,061                       | ,194 | ,285 | ,923 | ,802 | ,993  |
| 1,49 -1,59  | FA β-CH2               | 19,21 ± 1,28 | 17,68 ± 0,83   | 21,45 ± 0,84  | 21,16 ± 0,60  | 0,0164   | #, ‡ | ,647                       | ,313 | ,417 | ,026 | ,040 | ,995  |
| 1,90 -1,92  | Acetate                | 2,74 ± 0,28  | 2,24 ± 0,14    | 2,38 ± 0,10   | 2,35 ± 0,08   | 0,1735   |      | ,158                       | ,394 | ,314 | ,932 | ,961 | ,999  |
| 1,92 - 2,02 | FA =CH-CH2-CH2-        | 20,99 ± 1,35 | 19,45 ± 0,98   | 24,24 ± 0,80  | 23,16 ± 0,65  | 0,0046   | #, ‡ | ,684                       | ,094 | ,372 | ,006 | ,038 | ,836  |
| 2,02 -2,06  | NAC1                   | 8,88 ± 0,72  | 8,04 ± 0,37    | 11,45 ± 0,42  | 11,19 ± 0,39  | 1,05E-05 | #, ‡ | ,651                       | ,004 | ,008 | ,000 | ,000 | ,980  |

|             |                   |              |              |              |              |          |      |       |      |       |       |       |       |
|-------------|-------------------|--------------|--------------|--------------|--------------|----------|------|-------|------|-------|-------|-------|-------|
| 2,06 - 2,10 | NAC2              | 7,60 ± 0,41  | 6,91 ± 0,28  | 8,05 ± 0,30  | 7,89 ± 0,30  | 0,0844   |      | ,472  | ,763 | ,914  | ,081  | ,148  | ,984  |
| 2,18 - 2,24 | FA α-CH2          | 9,05 ± 0,50  | 8,00 ± 0,33  | 9,54 ± 0,37  | 9,18 ± 0,26  | 0,0363   | ‡    | ,222  | ,791 | ,994  | ,028  | ,115  | ,895  |
| 2,24 - 2,25 | 4-hydroxybutyrate | 4,29 ± 0,22  | 3,90 ± 0,16  | 4,68 ± 0,18  | 4,43 ± 0,13  | 0,0254   | ‡    | ,427  | ,399 | ,941  | ,016  | ,150  | ,706  |
| 2,30 - 2,36 | Proline           | 6,26 ± 0,35  | 5,59 ± 0,26  | 6,41 ± 0,26  | 6,21 ± 0,19  | 0,1623   |      | ,321  | ,977 | ,999  | ,147  | ,349  | ,943  |
| 2,39 - 2,48 | Glutamine         | 7,92 ± 0,47  | 6,65 ± 0,43  | 6,88 ± 0,32  | 6,82 ± 0,26  | 0,0871   |      | ,099  | ,209 | ,159  | ,971  | ,986  | ,999  |
| 2,67 - 2,72 | Citrate           | 4,46 ± 0,30  | 3,95 ± 0,25  | 4,98 ± 0,19  | 4,71 ± 0,19  | 0,0241   | ‡    | ,457  | ,392 | ,860  | ,017  | ,107  | ,823  |
| 2,72 - 2,80 | FA =CH-CH2-CH=    | 10,34 ± 0,85 | 9,45 ± 0,65  | 15,34 ± 0,56 | 14,74 ± 0,62 | 5,37E-08 | #, ‡ | ,800  | ,000 | ,000  | ,000  | ,000  | ,909  |
| 2,95 - 3,03 | Albumin lysyl     | 7,11 ± 0,35  | 6,04 ± 0,31  | 6,09 ± 0,22  | 6,21 ± 0,38  | 0,0945   |      | ,127  | ,142 | ,212  | 1,000 | ,982  | ,993  |
| 3,20 - 3,22 | Trimethylamines   | 5,13 ± 0,76  | 4,34 ± 0,36  | 5,53 ± 0,36  | 5,00 ± 0,20  | 0,3203   |      | ,620  | ,921 | ,997  | ,254  | ,712  | ,819  |
| 3,23 - 3,27 | Glucose           | 17,87 ± 1,59 | 16,29 ± 1,12 | 20,20 ± 0,55 | 19,77 ± 0,71 | 0,0398   | ‡    | ,721  | ,396 | ,557  | ,052  | ,091  | ,989  |
| 3,72 - 3,73 | Methylhitidine    | 4,60 ± 0,46  | 4,67 ± 0,45  | 5,70 ± 0,32  | 5,33 ± 0,20  | 0,1091   |      | ,999  | ,159 | ,477  | ,204  | ,560  | ,999  |
| 4,06 - 4,07 | Choline           | 0,33 ± 0,03  | 0,32 ± 0,01  | 0,31 ± 0,03  | 0,31 ± 0,02  | 0,9279   |      | ,998  | ,965 | ,927  | ,992  | ,975  | ,999  |
| 4,09 - 4,14 | Lactate           | 3,74 ± 0,26  | 3,33 ± 0,18  | 2,81 ± 0,15  | 3,05 ± 0,25  | 0,0322   | ‡    | ,577  | ,026 | ,126  | ,367  | ,798  | ,862  |
| 4,14 - 4,17 | Phosphocholine    | 1,33 ± 0,16  | 1,32 ± 0,07  | 1,37 ± 0,10  | 1,33 ± 0,10  | 0,991    |      | 1,000 | ,996 | 1,000 | ,990  | 1,000 | ,996  |
| 4,19 - 4,22 | Sucrose           | 0,67 ± 0,07  | 0,67 ± 0,04  | 0,64 ± 0,06  | 0,64 ± 0,06  | 0,9819   |      | 1,000 | ,991 | ,990  | ,993  | ,991  | 1,000 |
| 5,26 - 5,34 | FA -CH=CH         | 6,16 ± 0,68  | 5,84 ± 0,40  | 9,50 ± 0,37  | 9,02 ± 0,47  | 1,29E-06 | #, ‡ | ,970  | ,000 | ,001  | ,000  | ,000  | ,889  |
