# Supplementary material for: Hepatocyte MyD88 affects bile acids, gut microbiota and metabolome contributing to regulate glucose and lipid metabolism
Source: PubMed Central journal article supplement — Gut. 2016 May 5;66(4):620–32. doi: 10.1136/gutjnl-2015-310904 (PMC5529962; doi:10.1136/gutjnl-2015-310904), 2016-05-05
Supplement: gutjnl-2015-310904supp007.pdf [file gutjnl-2015-310904supp007.pdf]

**Table S6: Primers sequences**

| <b>Primers</b>   | <b>Forward Sequence</b>    | <b>Reverse Sequence</b>    |
|------------------|----------------------------|----------------------------|
| <i>FGFR4</i>     | CTCGATCCGCTTTGGGAATTC      | CAGGTCTGCCAAATCCTTGTC      |
| <i>Cyp7a1</i>    | AGCAACTAAACAACCTGCCAGTACTA | GTCCGGATATTCAAGGATGCA      |
| <i>Cyp8b1</i>    | GATCCGTCGCGGAGATAAGG       | CGGGTTGAGGAACCGATCAT       |
| <i>CD11c</i>     | ACGTCAGTACAAGGAGATGTTGGA   | ATCCTATTGCAGAATGCTTCTTTACC |
| <i>Cyp7b1</i>    | TAGGCATGACGATCCTGAAA       | TCTCTGGTGAAGTGGACTGAAA     |
| <i>Cyp27A1</i>   | TCTGGCTACCTGCACTTCCT       | GTGTGTTGGATGTCGTGTCC       |
| <i>FGF15</i>     | GAGGACCAAACGAACGAAATT      | ACGTCCTTGATGGCAATCG        |
| <i>Bal</i>       | TGTGTGTGAAGGAACCTGGA       | ACCCGGACAACCTTTGTGAAG      |
| <i>Bat</i>       | GCACAGGCTCATCAACAAGA       | TAGAGCACACCACGTTCTCTG      |
| <i>Hnf4a1</i>    | AAGAGGTCCATGGTGTTTAAGG     | ATCGAGGATGCGGATGGA         |
| <i>Abcb11</i>    | AGATACAACCGAAGGGGACA       | TCAACTTCTTCCACAAGCACA      |
| <i>Abcb4</i>     | GAGCCCGTGCTGTTCTCTAC       | TCTGTTTCTGTCCCCACTC        |
| <i>Ostb</i>      | GTATTTTCGTGCAGAAGATGCG     | TTTCTGTTTGCCAGGATGCTC      |
| <i>Ntcp</i>      | GGACAAGGTGCCCTACAAAG       | ACAGCCACAGAGAGGGAGAA       |
| <i>Otap1b2</i>   | ATCCCGTGACTAATCCAACA       | ACCAAAGTGTGCTCTATAAACT     |
| <i>Osta</i>      | TACAAGAACACCCTTTGCCC       | CGAGGAATCCAGAGACCAAA       |
| <i>Ibabp</i>     | CAAGGCTACCGTGAAGATGGA      | CCCACGACCTCCGAAGTCT        |
| <i>Asbt</i>      | TGGGTTTCTTCCTGGCTAGACT     | TGTTCTGCATTCCAGTTTCCAA     |
| <i>Reg3g</i>     | TTCCTGTCCTCCATGATCAAA      | CATCCACCTCTGTTGGGTTT       |
| <i>Claudin 1</i> | TTCGCAAAGCACCGGGCAGATACA   | GCCACTAATGTCGCCAGACCTGAAA  |
| <i>Claudin 3</i> | TCATCGGCAGCAGCATCATCAC     | ACGATGGTGATCTTGGCCTTGG     |
| <i>ZO1</i>       | TTTTTGACAGGGGGAGTGG        | TGCTGCAGAGGTCAAAGTTCAAG    |
| <i>Occludin</i>  | ATGTCCGGCCGATGCTCTC        | TTTGGCTGCTCTTGGGTCTGTAT    |
| <i>Myd88</i>     | CGGAACTTTTCGATGCCTTT       | TAGTTGCCGGATCATCTCCT       |
| <i>RPL19</i>     | GAAGGTCAAAGGGAATGTGTTCA    | CCTTGTCTGCCTTCAGCTTGT      |
